# Supplementary material for: A polyaromatic molecular tube that binds long hydrocarbons with high selectivity
Source: Springer Nature journal article supplement (doi:10.1038/ncomms6179), 2014-10-17
Supplement: 41467_2014_BFncomms6179_MOESM1_ESM.mol [file 41467_2014_BFncomms6179_MOESM1_ESM.mol]

  ChemDraw10141415322D

114130  0  0  0  0  0  0  0  0999 V2000
    0.0289    2.7875    0.0000 Cl  0  5  0  0  0  0  0  0  0  0  0  0
    0.0702   -2.7606    0.0000 Cl  0  5  0  0  0  0  0  0  0  0  0  0
   -4.1218    0.7134    0.0000 C   0  0  0  0  0  0  0  0  0  0  0  0
   -4.5343   -0.0011    0.0000 C   0  0  0  0  0  0  0  0  0  0  0  0
   -4.1218   -0.7156    0.0000 C   0  0  0  0  0  0  0  0  0  0  0  0
   -3.2968   -0.7156    0.0000 C   0  0  0  0  0  0  0  0  0  0  0  0
   -2.8843   -0.0011    0.0000 C   0  0  0  0  0  0  0  0  0  0  0  0
   -3.2968    0.7134    0.0000 C   0  0  0  0  0  0  0  0  0  0  0  0
   -2.8843    1.4278    0.0000 C   0  0  0  0  0  0  0  0  0  0  0  0
   -2.8843   -1.4301    0.0000 C   0  0  0  0  0  0  0  0  0  0  0  0
   -4.5343    1.4278    0.0000 O   0  0  0  0  0  0  0  0  0  0  0  0
   -5.3593    1.4278    0.0000 C   0  0  0  0  0  0  0  0  0  0  0  0
   -5.7718    2.1423    0.0000 C   0  0  0  0  0  0  0  0  0  0  0  0
   -4.5343   -1.4301    0.0000 O   0  0  0  0  0  0  0  0  0  0  0  0
   -5.3593   -1.4301    0.0000 C   0  0  0  0  0  0  0  0  0  0  0  0
   -5.7718   -2.1445    0.0000 C   0  0  0  0  0  0  0  0  0  0  0  0
   -2.0593    1.4278    0.0000 C   0  0  0  0  0  0  0  0  0  0  0  0
   -1.6468    2.1423    0.0000 C   0  0  0  0  0  0  0  0  0  0  0  0
   -2.0593    2.8568    0.0000 C   0  0  0  0  0  0  0  0  0  0  0  0
   -2.8843    2.8568    0.0000 C   0  0  0  0  0  0  0  0  0  0  0  0
   -3.2968    2.1423    0.0000 C   0  0  0  0  0  0  0  0  0  0  0  0
   -3.2968   -2.1445    0.0000 C   0  0  0  0  0  0  0  0  0  0  0  0
   -2.8843   -2.8590    0.0000 C   0  0  0  0  0  0  0  0  0  0  0  0
   -2.0593   -2.8590    0.0000 C   0  0  0  0  0  0  0  0  0  0  0  0
   -1.6468   -2.1445    0.0000 C   0  0  0  0  0  0  0  0  0  0  0  0
   -2.0593   -1.4301    0.0000 C   0  0  0  0  0  0  0  0  0  0  0  0
   -0.8218   -2.1445    0.0000 C   0  0  0  0  0  0  0  0  0  0  0  0
   -0.4093   -1.4301    0.0000 C   0  0  0  0  0  0  0  0  0  0  0  0
   -0.8218   -0.7156    0.0000 C   0  0  0  0  0  0  0  0  0  0  0  0
   -1.6468   -0.7156    0.0000 C   0  0  0  0  0  0  0  0  0  0  0  0
   -4.1218   -2.1445    0.0000 C   0  0  0  0  0  0  0  0  0  0  0  0
   -4.5343   -2.8590    0.0000 C   0  0  0  0  0  0  0  0  0  0  0  0
   -4.1218   -3.5735    0.0000 C   0  0  0  0  0  0  0  0  0  0  0  0
   -3.2968   -3.5735    0.0000 C   0  0  0  0  0  0  0  0  0  0  0  0
   -3.2968    3.5712    0.0000 C   0  0  0  0  0  0  0  0  0  0  0  0
   -4.1218    3.5712    0.0000 C   0  0  0  0  0  0  0  0  0  0  0  0
   -4.5343    2.8568    0.0000 C   0  0  0  0  0  0  0  0  0  0  0  0
   -4.1218    2.1423    0.0000 C   0  0  0  0  0  0  0  0  0  0  0  0
   -1.6468    0.7134    0.0000 C   0  0  0  0  0  0  0  0  0  0  0  0
   -0.8218    0.7134    0.0000 C   0  0  0  0  0  0  0  0  0  0  0  0
   -0.4093    1.4278    0.0000 C   0  0  0  0  0  0  0  0  0  0  0  0
   -0.8218    2.1423    0.0000 C   0  0  0  0  0  0  0  0  0  0  0  0
   -1.6468    3.5712    0.0000 C   0  0  0  0  0  0  0  0  0  0  0  0
   -1.6468   -3.5735    0.0000 C   0  0  0  0  0  0  0  0  0  0  0  0
   -0.8218    3.5712    0.0000 C   0  0  0  0  0  0  0  0  0  0  0  0
   -0.4093    4.2857    0.0000 N   0  3  0  0  0  0  0  0  0  0  0  0
   -0.8218    5.0002    0.0000 C   0  0  0  0  0  0  0  0  0  0  0  0
   -1.6468    5.0002    0.0000 C   0  0  0  0  0  0  0  0  0  0  0  0
   -2.0593    4.2857    0.0000 C   0  0  0  0  0  0  0  0  0  0  0  0
   -2.0593   -4.2879    0.0000 C   0  0  0  0  0  0  0  0  0  0  0  0
   -1.6468   -5.0024    0.0000 C   0  0  0  0  0  0  0  0  0  0  0  0
   -0.8218   -5.0024    0.0000 C   0  0  0  0  0  0  0  0  0  0  0  0
   -0.4093   -4.2879    0.0000 N   0  3  0  0  0  0  0  0  0  0  0  0
   -0.8218   -3.5735    0.0000 C   0  0  0  0  0  0  0  0  0  0  0  0
    4.1218    0.7156    0.0000 C   0  0  0  0  0  0  0  0  0  0  0  0
    4.5343    0.0011    0.0000 C   0  0  0  0  0  0  0  0  0  0  0  0
    4.1218   -0.7134    0.0000 C   0  0  0  0  0  0  0  0  0  0  0  0
    3.2968   -0.7134    0.0000 C   0  0  0  0  0  0  0  0  0  0  0  0
    2.8843    0.0011    0.0000 C   0  0  0  0  0  0  0  0  0  0  0  0
    3.2968    0.7156    0.0000 C   0  0  0  0  0  0  0  0  0  0  0  0
    2.8843    1.4301    0.0000 C   0  0  0  0  0  0  0  0  0  0  0  0
    2.8843   -1.4278    0.0000 C   0  0  0  0  0  0  0  0  0  0  0  0
    4.5343    1.4301    0.0000 O   0  0  0  0  0  0  0  0  0  0  0  0
    5.3593    1.4301    0.0000 C   0  0  0  0  0  0  0  0  0  0  0  0
    5.7718    2.1445    0.0000 C   0  0  0  0  0  0  0  0  0  0  0  0
    4.5343   -1.4278    0.0000 O   0  0  0  0  0  0  0  0  0  0  0  0
    5.3593   -1.4278    0.0000 C   0  0  0  0  0  0  0  0  0  0  0  0
    5.7718   -2.1423    0.0000 C   0  0  0  0  0  0  0  0  0  0  0  0
    2.0593    1.4301    0.0000 C   0  0  0  0  0  0  0  0  0  0  0  0
    1.6468    2.1445    0.0000 C   0  0  0  0  0  0  0  0  0  0  0  0
    2.0593    2.8590    0.0000 C   0  0  0  0  0  0  0  0  0  0  0  0
    2.8843    2.8590    0.0000 C   0  0  0  0  0  0  0  0  0  0  0  0
    3.2968    2.1445    0.0000 C   0  0  0  0  0  0  0  0  0  0  0  0
    3.2968   -2.1423    0.0000 C   0  0  0  0  0  0  0  0  0  0  0  0
    2.8843   -2.8568    0.0000 C   0  0  0  0  0  0  0  0  0  0  0  0
    2.0593   -2.8568    0.0000 C   0  0  0  0  0  0  0  0  0  0  0  0
    1.6468   -2.1423    0.0000 C   0  0  0  0  0  0  0  0  0  0  0  0
    2.0593   -1.4278    0.0000 C   0  0  0  0  0  0  0  0  0  0  0  0
    0.8218   -2.1423    0.0000 C   0  0  0  0  0  0  0  0  0  0  0  0
    0.4093   -1.4278    0.0000 C   0  0  0  0  0  0  0  0  0  0  0  0
    0.8218   -0.7134    0.0000 C   0  0  0  0  0  0  0  0  0  0  0  0
    1.6468   -0.7134    0.0000 C   0  0  0  0  0  0  0  0  0  0  0  0
    4.1218   -2.1423    0.0000 C   0  0  0  0  0  0  0  0  0  0  0  0
    4.5343   -2.8568    0.0000 C   0  0  0  0  0  0  0  0  0  0  0  0
    4.1218   -3.5712    0.0000 C   0  0  0  0  0  0  0  0  0  0  0  0
    3.2968   -3.5712    0.0000 C   0  0  0  0  0  0  0  0  0  0  0  0
    3.2968    3.5735    0.0000 C   0  0  0  0  0  0  0  0  0  0  0  0
    4.1218    3.5735    0.0000 C   0  0  0  0  0  0  0  0  0  0  0  0
    4.5343    2.8590    0.0000 C   0  0  0  0  0  0  0  0  0  0  0  0
    4.1218    2.1445    0.0000 C   0  0  0  0  0  0  0  0  0  0  0  0
    1.6468    0.7156    0.0000 C   0  0  0  0  0  0  0  0  0  0  0  0
    0.8218    0.7156    0.0000 C   0  0  0  0  0  0  0  0  0  0  0  0
    0.4093    1.4301    0.0000 C   0  0  0  0  0  0  0  0  0  0  0  0
    0.8218    2.1445    0.0000 C   0  0  0  0  0  0  0  0  0  0  0  0
    1.6468    3.5735    0.0000 C   0  0  0  0  0  0  0  0  0  0  0  0
    1.6468   -3.5712    0.0000 C   0  0  0  0  0  0  0  0  0  0  0  0
    0.8218    3.5735    0.0000 C   0  0  0  0  0  0  0  0  0  0  0  0
    0.4093    4.2879    0.0000 C   0  0  0  0  0  0  0  0  0  0  0  0
    0.8218    5.0024    0.0000 C   0  0  0  0  0  0  0  0  0  0  0  0
    1.6468    5.0024    0.0000 C   0  0  0  0  0  0  0  0  0  0  0  0
    2.0593    4.2879    0.0000 C   0  0  0  0  0  0  0  0  0  0  0  0
    2.0593   -4.2857    0.0000 C   0  0  0  0  0  0  0  0  0  0  0  0
    1.6468   -5.0002    0.0000 C   0  0  0  0  0  0  0  0  0  0  0  0
    0.8218   -5.0002    0.0000 C   0  0  0  0  0  0  0  0  0  0  0  0
    0.4093   -4.2857    0.0000 C   0  0  0  0  0  0  0  0  0  0  0  0
    0.8218   -3.5712    0.0000 C   0  0  0  0  0  0  0  0  0  0  0  0
   -6.5968   -2.1445    0.0000 O   0  0  0  0  0  0  0  0  0  0  0  0
   -7.0093   -2.8590    0.0000 C   0  0  0  0  0  0  0  0  0  0  0  0
   -6.5968    2.1423    0.0000 O   0  0  0  0  0  0  0  0  0  0  0  0
    6.5968    2.1445    0.0000 O   0  0  0  0  0  0  0  0  0  0  0  0
    7.0093    2.8590    0.0000 C   0  0  0  0  0  0  0  0  0  0  0  0
    6.5968   -2.1423    0.0000 O   0  0  0  0  0  0  0  0  0  0  0  0
    7.0093   -2.8568    0.0000 C   0  0  0  0  0  0  0  0  0  0  0  0
   -7.0093    2.8568    0.0000 C   0  0  0  0  0  0  0  0  0  0  0  0
  3  4  2  0      
  4  5  1  0      
  5  6  2  0      
  6  7  1  0      
  7  8  2  0      
  8  3  1  0      
  8  9  1  0      
  6 10  1  0      
  3 11  1  0      
 11 12  1  0      
 12 13  1  0      
  5 14  1  0      
 14 15  1  0      
 15 16  1  0      
  9 17  2  0      
 17 18  1  0      
 18 19  2  0      
 19 20  1  0      
 20 21  2  0      
 21  9  1  0      
 10 22  2  0      
 22 23  1  0      
 23 24  2  0      
 24 25  1  0      
 25 26  2  0      
 26 10  1  0      
 25 27  1  0      
 27 28  2  0      
 28 29  1  0      
 29 30  2  0      
 30 26  1  0      
 22 31  1  0      
 31 32  2  0      
 32 33  1  0      
 33 34  2  0      
 34 23  1  0      
 20 35  1  0      
 35 36  2  0      
 36 37  1  0      
 37 38  2  0      
 38 21  1  0      
 17 39  1  0      
 39 40  2  0      
 40 41  1  0      
 41 42  2  0      
 42 18  1  0      
 19 43  1  0      
 24 44  1  0      
 43 45  2  0      
 45 46  1  0      
 46 47  2  0      
 47 48  1  0      
 48 49  2  0      
 49 43  1  0      
 44 50  2  0      
 50 51  1  0      
 51 52  2  0      
 52 53  1  0      
 53 54  2  0      
 54 44  1  0      
 55 56  2  0      
 56 57  1  0      
 57 58  2  0      
 58 59  1  0      
 59 60  2  0      
 60 55  1  0      
 60 61  1  0      
 58 62  1  0      
 55 63  1  0      
 63 64  1  0      
 64 65  1  0      
 57 66  1  0      
 66 67  1  0      
 67 68  1  0      
 61 69  2  0      
 69 70  1  0      
 70 71  2  0      
 71 72  1  0      
 72 73  2  0      
 73 61  1  0      
 62 74  2  0      
 74 75  1  0      
 75 76  2  0      
 76 77  1  0      
 77 78  2  0      
 78 62  1  0      
 77 79  1  0      
 79 80  2  0      
 80 81  1  0      
 81 82  2  0      
 82 78  1  0      
 74 83  1  0      
 83 84  2  0      
 84 85  1  0      
 85 86  2  0      
 86 75  1  0      
 72 87  1  0      
 87 88  2  0      
 88 89  1  0      
 89 90  2  0      
 90 73  1  0      
 69 91  1  0      
 91 92  2  0      
 92 93  1  0      
 93 94  2  0      
 94 70  1  0      
 71 95  1  0      
 76 96  1  0      
 95 97  2  0      
 97 98  1  0      
 98 99  2  0      
 99100  1  0      
100101  2  0      
101 95  1  0      
 96102  2  0      
102103  1  0      
103104  2  0      
104105  1  0      
105106  2  0      
106 96  1  0      
 46 98  1  0      
 53105  1  0      
 16107  1  0      
107108  1  0      
 13109  1  0      
 65110  1  0      
110111  1  0      
 68112  1  0      
112113  1  0      
109114  1  0      
M  CHG  4   1  -1   2  -1  46   1  53   1
M  END
